# Supplementary material
Source: HighWire-hosted journal article supplement (https://stke.sciencemag.org/content/suppl/2009/06/22/2.76.ra29)
Supplement: 2_ra29_SM.pdf [file 2_ra29_SM.pdf]

Supplementary Materials for  
**The Kinesin Protein Kif7 Is a Critical Regulator of Gli Transcription  
Factors in Mammalian Hedgehog Signaling**

Helen Oi-Lam Cheung, Xiaoyun Zhang, Ana Ribeiro, Rong Mo, Shigeru Makino, Vijitha Puvindran, Kelvin King Lo Law, James Briscoe, Chi-chung Hui\*

\*To whom correspondence should be addressed. E-mail: cchui@sickkids.ca

Published 23 June 2009, *Sci. Signal.* **2**, ra29 (2009)  
DOI: 10.1126/scisignal.2000405

**This PDF file includes:**

- Fig. S1. Interaction of Kif7 and Kif27 with Gli transcription factors.
- Fig. S2. Gene targeting of *Kif7*.
- Fig. S3. Kif7 inhibits SmoM2-induced Gli transcriptional activity in ovo.

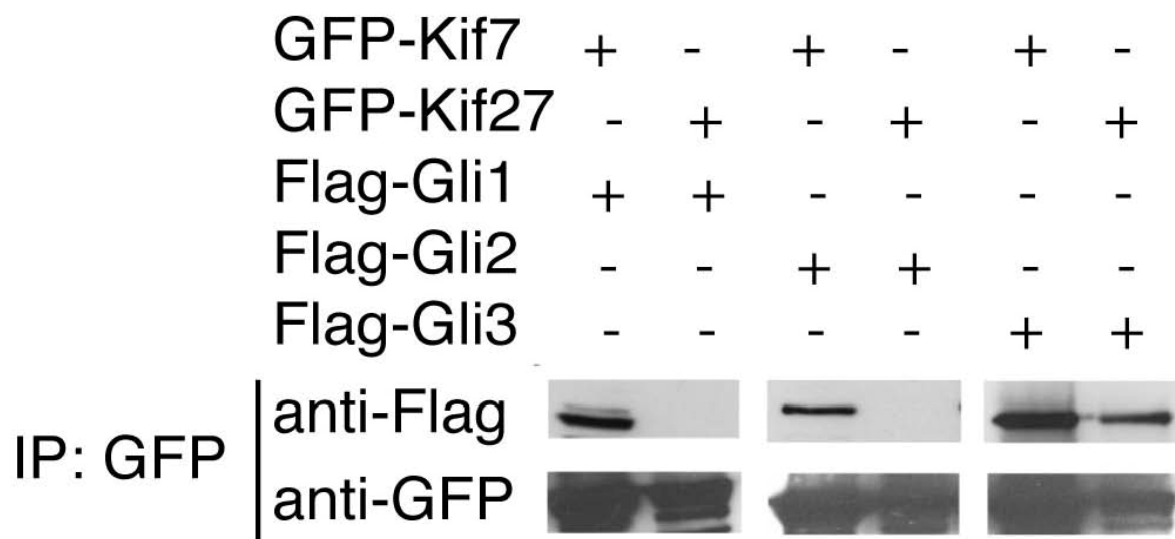

**Fig. S1.** Interaction of Kif7 and Kif27 with Gli transcription factors.

Coimmunoprecipitation experiments with lysates from transfected COS-7 cells revealed that Kif7 interacts with Gli1, Gli2, and Gli3, whereas Kif27 only interacts with Gli3.

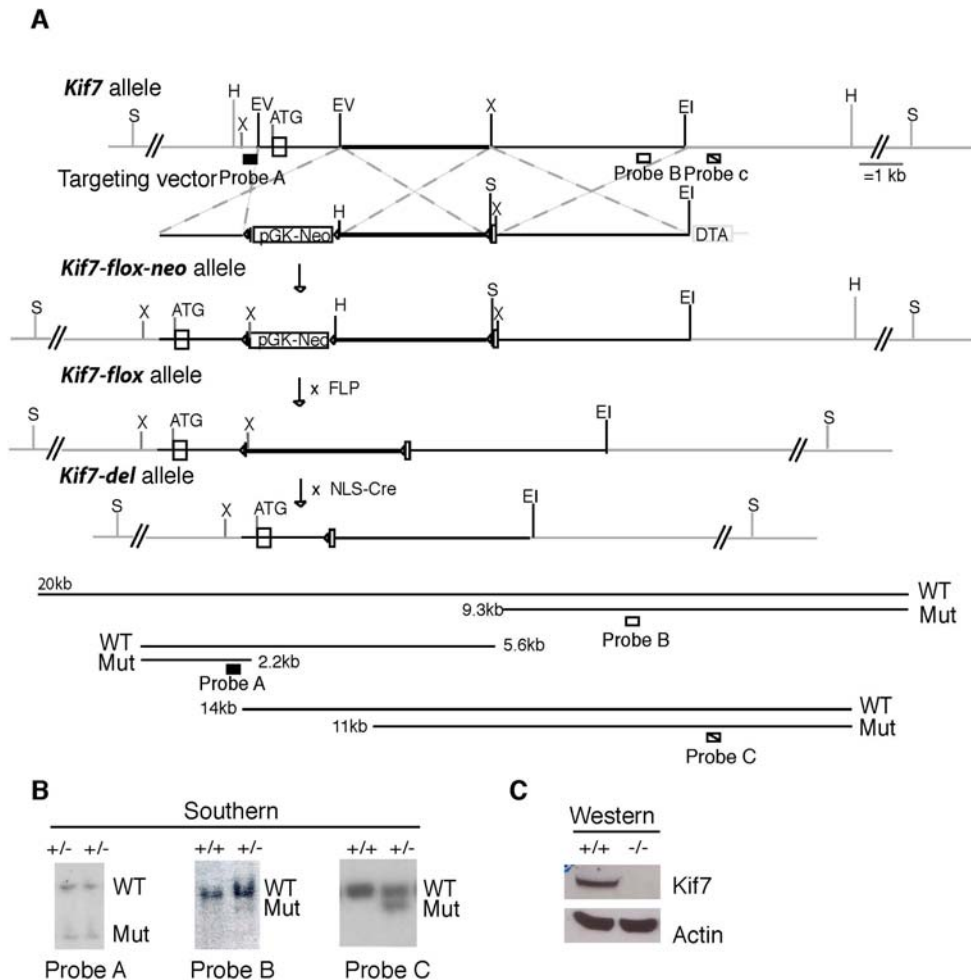

**Fig. S2.** Gene targeting of *Kif7*. **(A)** A conditional mutant allele of *Kif7* was generated by gene targeting in embryonic stem cells. The targeting vector contains a pair of *loxP* sites flanking exons 2-4 as well as a *frt*-flanked neomycin selection cassette (PGK-neo) inserted 5' to exon 2. Three probes used for screening are indicated and the corresponding predicted size of wild-type and mutant bands are shown at the bottom. El: *EcoRI*, EV: *EcoRV*, H: *HindIII*, S: *SpeI*, X: *XbaI*. **(B)** Southern blotting results using probes A, B, or C all indicate correct recombination of the targeting constructs. *Kif7<sup>flox/flox</sup>* mice do not exhibit any phenotype. By crossing *Kif7<sup>flox/flox</sup>* mice with *NLS-Cre* mice, *Kif7<sup>del/+</sup>* mice carrying a deletion of exons 2 to 4 of *Kif7* were generated. *Kif7<sup>del/+</sup>* mice are viable, fertile, and have no discernible phenotype. *Kif7<sup>del/+</sup>* is denoted as *Kif7<sup>+/-</sup>*. **(C)** Western blot analysis of E10.5 total embryo lysate revealed no detectable Kif7 protein in *Kif7<sup>-/-</sup>* mice. Actin was used as a loading control.

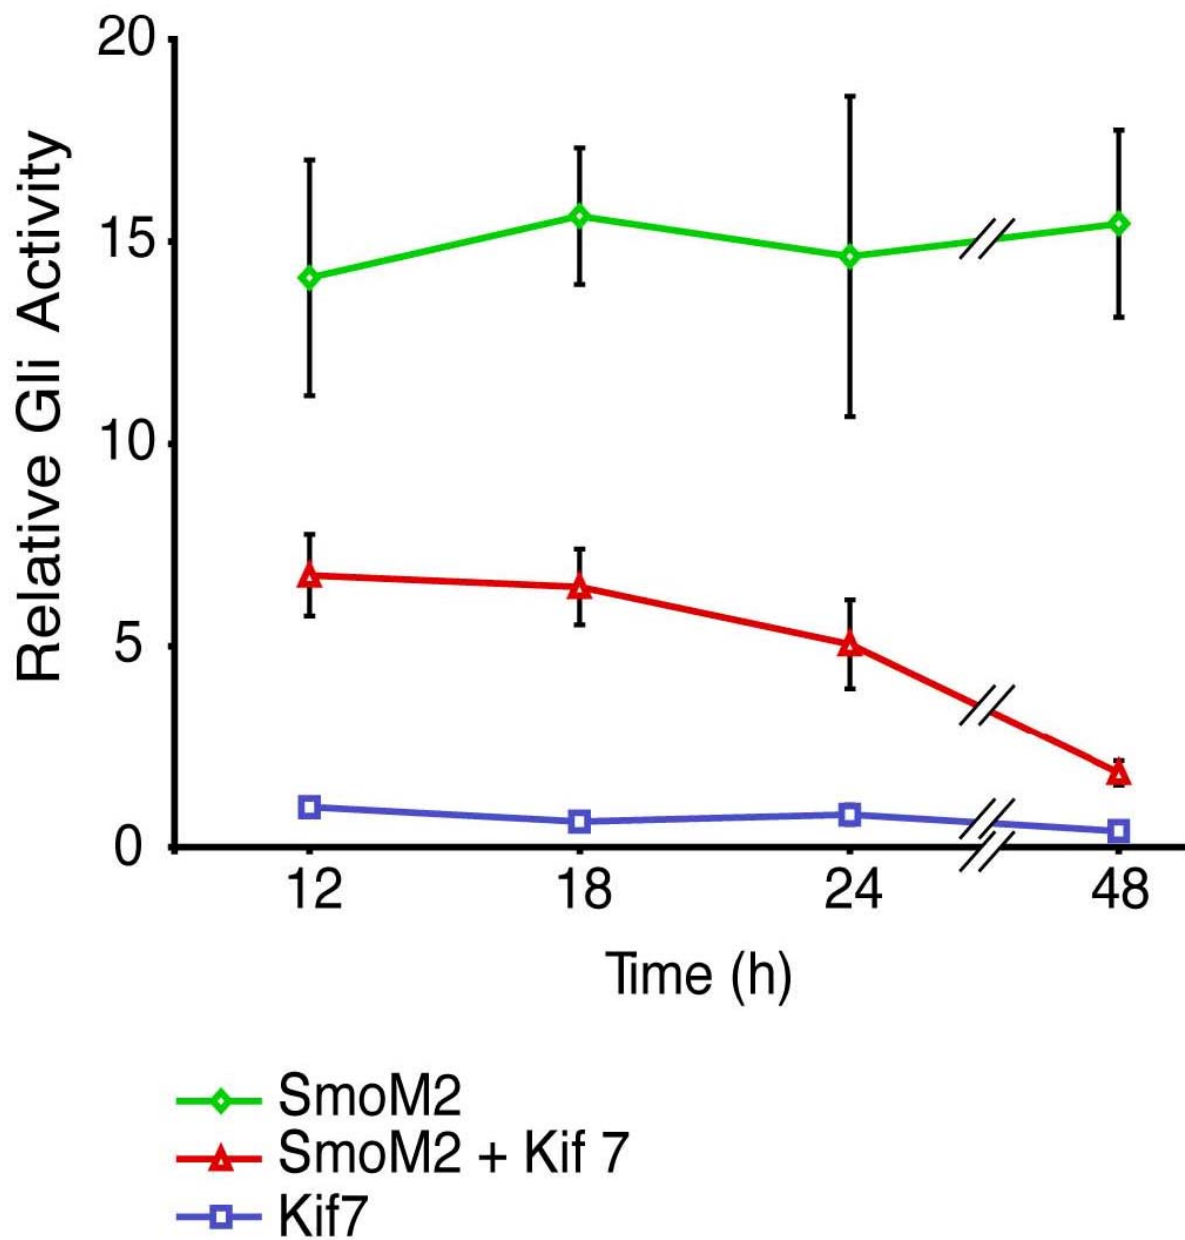

**Fig. S3.** Kif7 inhibits SmoM2-induced Gli transcriptional activity in ovo. A Gli-luciferase reporter gene was electroporated in ovo with Kif7 (blue), SmoM2 (green), or both (red), and luciferase activity was measured at different times post-electroporation as indicated.
